# Supplementary material
Source: PubMed Central journal article supplement (PMC4780837)
Supplement: jp5b11489_si_001.pdf [file jp5b11489_si_001.pdf]

# Supplementary Material: A Comparative Ab-Initio Study of Substituted Norbornadiene-Quadricyclane Compounds for Solar Thermal Storage

Mikael J. Kuisma,<sup>\*,†</sup> Angelica M. Lundin,<sup>‡</sup> Kasper Moth-Poulsen,<sup>‡</sup> Per  
Hyldgaard,<sup>¶</sup> and Paul Erhart<sup>\*,†</sup>

*Department of Physics, Chalmers University of Technology, Gothenburg, Sweden ,  
Department of Chemistry and Chemical Engineering, Chalmers University of Technology,  
Gothenburg, Sweden , and Department of Microtechnology and Nanoscience, Chalmers  
University of Technology, Gothenburg, Sweden*

E-mail: mikael.kuisma@chalmers.se; erhart@chalmers.se

## Molecular structure of the un- substituted compound (1)

Detailed comparison unsubstituted norbornadiene and quadricyclane is presented in Tables 1 and 2.

## Compilation of results from calculations of storage energy

The storage energies (electronic energy difference between N and Q) computed using CASPT2 as well as DFT are compiled in Table 3.

---

<sup>\*</sup>To whom correspondence should be addressed

<sup>†</sup>Department of Physics, Chalmers University of Technology, Gothenburg, Sweden

<sup>‡</sup>Department of Chemistry and Chemical Engineering, Chalmers University of Technology, Gothenburg, Sweden

<sup>¶</sup>Department of Microtechnology and Nanoscience, Chalmers University of Technology, Gothenburg, Sweden

## Compilation of results from calculations of absorption be- havior

The first excitation energies obtained from CASPT2 calculations are compiled in Table 4. Excitation energies and dipole strengths from TD-DFT calculations for the first five excitations of the molecules considered in this study are compiled in Tables 5 and 6. Figure 1 shows the molar attenuation coefficients in toluene obtained using different exchange-correlation functionals, which are based on the data presented in Table 6.

## Convergence of MP2 and CCSD(T) calculations with basis set

As a further benchmark of our calculations, we performed an accurate comparison of computational and experimental results regarding the geometry and the gas-phase thermochemistry of the unsubstituted norbornadiene quadricyclane system (1). All geometries were fully relaxed

**Table 1: Bond lengths  $r$  in Å and angles  $\theta$  of norbornadiene compared to experimental values.**

| N                          | $r(\text{C2-C3})$ | $r(\text{C1-C2})$ | $r(\text{C1-C7})$ | $\theta(\text{C1,C4,C7})$ |
|----------------------------|-------------------|-------------------|-------------------|---------------------------|
| Experiment 1 <sup>1</sup>  | 1.3362            | 1.5304            | 1.5567            |                           |
| Experiment 2 <sup>a2</sup> | 1.338             | 1.533             | 1.571             | 92.2°                     |
| PBE                        | 1.343             | 1.544             | 1.562             | 92.2°                     |
| B3LYP                      | 1.334             | 1.544             | 1.561             | 92.0°                     |
| B3LYP (aug-cc-vtzp)        | 1.329             | 1.540             | 1.558             | 92.0°                     |
| MP2 (aug-cc-vdzp)          | 1.358             | 1.542             | 1.564             | 92.4°                     |
| MP2 (aug-cc-vtzp)          | 1.342             | 1.532             | 1.553             | 92.3°                     |
| M06                        | 1.329             | 1.532             | 1.546             | 92.2°                     |

<sup>a</sup> Data from fit I; fit II yields and angle  $\theta(\text{C1,C4,C7})$  of 96°, which is not supported by the computational data.

**Table 2: Bond lengths  $r$  in Å and angles  $\theta$  of quadricyclane compared to experimental values.**

| Q                       | $r(\text{C-C(short)})$ | $r(\text{C-C(long)})$ | $\theta(\text{C1,C7,C4})$ |
|-------------------------|------------------------|-----------------------|---------------------------|
| Experiment <sup>3</sup> | 1.518                  | 1.562                 | 98.50°                    |
| PBE                     | 1.522                  | 1.551                 | 98.88°                    |
| B3LYP                   | 1.517                  | 1.550                 | 98.85°                    |
| B3LYP (aug-cc-vtzp)     | 1.513                  | 1.547                 | 98.82°                    |
| MP2 (aug-cc-vdzp)       | 1.533                  | 1.552                 | 98.92°                    |
| MP2 (aug-cc-vtzp)       | 1.519                  | 1.540                 | 98.84°                    |
| M06                     | 1.507                  | 1.538                 | 98.85°                    |

**Table 3: Storage energies in kJ/mol from CASPT2 as well as DFT calculations.**

| Compound       | <b>1</b> | <b>2</b> | <b>3</b> | <b>4</b> | <b>5</b> | <b>6</b> |
|----------------|----------|----------|----------|----------|----------|----------|
|                | Vacuum   |          |          |          |          |          |
| CASPT2//CASSCF | 91       | 100      | 101      | 99       | 99       | 99       |
| CASPT2//PBE    | 94       | 96       | 97       | 98       | 97       | 102      |
| PBE            | 71       | 91       | 87       | 86       | 86       | 90       |
| B3LYP          | 99       | 115      | 113      | 112      | 112      | 115      |
| CAM-B3LYP      | 87       | 100      | 98       | 96       | 96       | 99       |
| M06-L          | 41       | 71       | 61       | 69       | 67       | 67       |
| M06            | 53       | 62       | 68       | 68       | 67       | 74       |
| M06-2x         | 65       | 75       | 76       | 73       | 75       | 74       |
|                | Toluene  |          |          |          |          |          |
| PBE            | 64       | 86       | 83       | 82       | 83       | 87       |
| B3LYP          | 93       | 111      | 109      | 108      | 108      | 112      |
| CAM-B3LYP      | 80       | 96       | 94       | 93       | 93       | 96       |

**Table 4: Excitation energies under vacuum conditions in eV from CASPT2 calculations.**

| Compound       | 1    | 2    | 3    | 4    | 5    | 6    |
|----------------|------|------|------|------|------|------|
| CASPT2//CASSCF | 5.32 | 4.47 | 4.40 | 4.29 | 4.22 | 3.96 |
| CASPT2//PBE    | 5.32 | 4.15 | 4.04 | 3.94 | 3.82 | 3.66 |

**Table 5: Excitation energies in eV and dipole strengths (given in brackets) in vacuum from TD-DFT calculations using different exchange-correlation functionals.**

|   |   | PBE       |        |      |        |      |        |      |        |      |        |
|---|---|-----------|--------|------|--------|------|--------|------|--------|------|--------|
| 1 | N | 4.47      | (0.00) | 5.00 | (0.01) | 5.19 | (0.01) | 5.76 | (0.00) | 5.86 | (0.00) |
| 1 | Q | 5.00      | (0.00) | 5.44 | (0.00) | 5.51 | (0.00) | 5.62 | (0.01) | 6.06 | (0.02) |
| 2 | N | 3.21      | (0.17) | 3.71 | (0.02) | 3.80 | (0.06) | 4.01 | (0.01) | 4.03 | (0.02) |
| 2 | Q | 4.10      | (0.00) | 4.11 | (0.00) | 4.25 | (0.00) | 4.38 | (0.00) | 4.57 | (0.01) |
| 3 | N | 3.05      | (0.18) | 3.54 | (0.04) | 3.79 | (0.00) | 3.85 | (0.01) | 3.92 | (0.04) |
| 3 | Q | 3.73      | (0.01) | 3.85 | (0.05) | 3.98 | (0.01) | 4.22 | (0.05) | 4.44 | (0.04) |
| 4 | N | 2.86      | (0.18) | 3.46 | (0.02) | 3.62 | (0.01) | 3.84 | (0.06) | 3.85 | (0.00) |
| 4 | Q | 3.40      | (0.04) | 3.65 | (0.01) | 3.97 | (0.03) | 4.05 | (0.04) | 4.24 | (0.01) |
| 5 | N | 2.67      | (0.21) | 3.42 | (0.01) | 3.43 | (0.02) | 3.68 | (0.14) | 3.80 | (0.01) |
| 5 | Q | 3.06      | (0.05) | 3.60 | (0.00) | 3.70 | (0.10) | 4.00 | (0.01) | 4.18 | (0.01) |
| 6 | N | 2.54      | (0.23) | 3.16 | (0.02) | 3.41 | (0.03) | 3.58 | (0.01) | 3.68 | (0.01) |
| 6 | Q | 2.78      | (0.02) | 3.16 | (0.01) | 3.78 | (0.12) | 3.85 | (0.02) | 3.96 | (0.01) |
|   |   | B3LYP     |        |      |        |      |        |      |        |      |        |
| 1 | N | 4.86      | (0.00) | 5.56 | (0.01) | 5.58 | (0.01) | 6.15 | (0.00) | 6.15 | (0.02) |
| 1 | Q | 5.47      | (0.00) | 5.84 | (0.00) | 5.95 | (0.00) | 6.08 | (0.01) | 6.53 | (0.02) |
| 2 | N | 3.70      | (0.22) | 4.32 | (0.02) | 4.53 | (0.05) | 4.63 | (0.02) | 4.70 | (0.03) |
| 2 | Q | 4.94      | (0.00) | 5.06 | (0.00) | 5.12 | (0.00) | 5.13 | (0.00) | 5.23 | (0.00) |
| 3 | N | 3.58      | (0.22) | 4.17 | (0.04) | 4.49 | (0.01) | 4.60 | (0.07) | 4.65 | (0.02) |
| 3 | Q | 4.54      | (0.03) | 4.67 | (0.06) | 4.83 | (0.04) | 5.01 | (0.05) | 5.11 | (0.00) |
| 4 | N | 3.40      | (0.23) | 4.11 | (0.03) | 4.45 | (0.03) | 4.49 | (0.01) | 4.54 | (0.07) |
| 4 | Q | 4.28      | (0.08) | 4.53 | (0.01) | 4.75 | (0.02) | 4.81 | (0.07) | 5.00 | (0.02) |
| 5 | N | 3.23      | (0.26) | 4.07 | (0.01) | 4.29 | (0.03) | 4.36 | (0.14) | 4.46 | (0.01) |
| 5 | Q | 3.99      | (0.11) | 4.47 | (0.08) | 4.51 | (0.07) | 4.74 | (0.02) | 4.90 | (0.02) |
| 6 | N | 3.11      | (0.27) | 3.88 | (0.04) | 4.16 | (0.05) | 4.26 | (0.01) | 4.35 | (0.02) |
| 6 | Q | 3.72      | (0.03) | 4.10 | (0.02) | 4.36 | (0.03) | 4.43 | (0.06) | 4.49 | (0.11) |
|   |   | CAM-B3LYP |        |      |        |      |        |      |        |      |        |
| 1 | N | 5.21      | (0.00) | 6.08 | (0.02) | 6.12 | (0.03) | 6.54 | (0.03) | 6.71 | (0.00) |
| 1 | Q | 5.97      | (0.00) | 6.30 | (0.00) | 6.48 | (0.00) | 6.62 | (0.00) | 7.15 | (0.02) |
| 2 | N | 4.17      | (0.24) | 4.90 | (0.02) | 5.15 | (0.00) | 5.29 | (0.09) | 5.43 | (0.11) |
| 2 | Q | 5.38      | (0.00) | 5.41 | (0.00) | 5.85 | (0.09) | 5.87 | (0.03) | 6.05 | (0.05) |
| 3 | N | 4.10      | (0.25) | 4.74 | (0.05) | 5.04 | (0.01) | 5.32 | (0.12) | 5.39 | (0.16) |
| 3 | Q | 5.00      | (0.02) | 5.25 | (0.00) | 5.38 | (0.18) | 5.68 | (0.20) | 5.73 | (0.03) |
| 4 | N | 3.97      | (0.27) | 4.74 | (0.04) | 5.01 | (0.01) | 5.26 | (0.16) | 5.38 | (0.17) |
| 4 | Q | 5.00      | (0.02) | 5.19 | (0.10) | 5.20 | (0.11) | 5.60 | (0.26) | 5.80 | (0.02) |
| 5 | N | 3.84      | (0.32) | 4.70 | (0.03) | 4.96 | (0.02) | 5.11 | (0.28) | 5.30 | (0.01) |
| 5 | Q | 4.88      | (0.27) | 5.03 | (0.07) | 5.07 | (0.03) | 5.53 | (0.23) | 5.62 | (0.09) |
| 6 | N | 3.76      | (0.35) | 4.46 | (0.06) | 4.85 | (0.03) | 4.89 | (0.01) | 5.05 | (0.21) |
| 6 | Q | 4.61      | (0.03) | 4.89 | (0.23) | 4.92 | (0.01) | 5.20 | (0.02) | 5.30 | (0.34) |

**Table 6: Excitation energies in eV and dipole strengths (given in brackets) in toluene from TD-DFT calculations using different exchange-correlation functionals.**

| PBE       |   |      |        |      |        |      |        |      |        |      |        |
|-----------|---|------|--------|------|--------|------|--------|------|--------|------|--------|
| 1         | N | 4.48 | (0.00) | 5.01 | (0.01) | 5.33 | (0.01) | 5.93 | (0.00) | 5.99 | (0.00) |
| 1         | Q | 5.11 | (0.00) | 5.49 | (0.00) | 5.63 | (0.00) | 5.70 | (0.01) | 6.17 | (0.02) |
| 2         | N | 3.22 | (0.17) | 3.70 | (0.02) | 3.80 | (0.07) | 4.00 | (0.01) | 4.04 | (0.02) |
| 2         | Q | 4.00 | (0.00) | 4.00 | (0.01) | 4.14 | (0.00) | 4.27 | (0.00) | 4.54 | (0.01) |
| 3         | N | 3.05 | (0.18) | 3.54 | (0.04) | 3.79 | (0.00) | 3.85 | (0.01) | 3.91 | (0.05) |
| 3         | Q | 3.67 | (0.01) | 3.79 | (0.06) | 3.92 | (0.00) | 4.18 | (0.05) | 4.39 | (0.03) |
| 4         | N | 2.83 | (0.19) | 3.44 | (0.02) | 3.57 | (0.01) | 3.83 | (0.09) | 3.84 | (0.00) |
| 4         | Q | 3.29 | (0.05) | 3.57 | (0.01) | 3.90 | (0.04) | 3.97 | (0.04) | 4.19 | (0.01) |
| 5         | N | 2.61 | (0.20) | 3.36 | (0.01) | 3.41 | (0.00) | 3.66 | (0.17) | 3.78 | (0.01) |
| 5         | Q | 2.94 | (0.06) | 3.53 | (0.02) | 3.57 | (0.08) | 3.95 | (0.01) | 4.13 | (0.01) |
| 6         | N | 2.46 | (0.24) | 3.08 | (0.02) | 3.35 | (0.03) | 3.53 | (0.02) | 3.65 | (0.01) |
| 6         | Q | 2.67 | (0.02) | 3.07 | (0.00) | 3.66 | (0.13) | 3.78 | (0.02) | 3.87 | (0.01) |
| B3LYP     |   |      |        |      |        |      |        |      |        |      |        |
| 1         | N | 4.88 | (0.00) | 5.57 | (0.01) | 5.70 | (0.02) | 6.28 | (0.02) | 6.31 | (0.00) |
| 1         | Q | 5.56 | (0.00) | 5.88 | (0.00) | 6.07 | (0.00) | 6.14 | (0.00) | 6.63 | (0.02) |
| 2         | N | 3.69 | (0.22) | 4.32 | (0.02) | 4.51 | (0.05) | 4.63 | (0.01) | 4.70 | (0.04) |
| 2         | Q | 4.84 | (0.00) | 4.96 | (0.00) | 5.03 | (0.00) | 5.11 | (0.00) | 5.22 | (0.00) |
| 3         | N | 3.56 | (0.23) | 4.16 | (0.04) | 4.47 | (0.01) | 4.58 | (0.07) | 4.65 | (0.01) |
| 3         | Q | 4.55 | (0.03) | 4.66 | (0.04) | 4.80 | (0.05) | 4.97 | (0.02) | 5.07 | (0.04) |
| 4         | N | 3.37 | (0.23) | 4.10 | (0.02) | 4.41 | (0.03) | 4.48 | (0.01) | 4.52 | (0.08) |
| 4         | Q | 4.25 | (0.10) | 4.52 | (0.01) | 4.70 | (0.07) | 4.73 | (0.02) | 4.96 | (0.02) |
| 5         | N | 3.16 | (0.27) | 4.06 | (0.01) | 4.22 | (0.03) | 4.33 | (0.15) | 4.44 | (0.01) |
| 5         | Q | 3.91 | (0.13) | 4.32 | (0.12) | 4.47 | (0.01) | 4.73 | (0.02) | 4.87 | (0.02) |
| 6         | N | 3.04 | (0.28) | 3.82 | (0.04) | 4.11 | (0.05) | 4.21 | (0.01) | 4.33 | (0.05) |
| 6         | Q | 3.62 | (0.03) | 4.04 | (0.01) | 4.30 | (0.03) | 4.38 | (0.14) | 4.53 | (0.06) |
| CAM-B3LYP |   |      |        |      |        |      |        |      |        |      |        |
| 1         | N | 5.23 | (0.00) | 6.11 | (0.03) | 6.20 | (0.02) | 6.65 | (0.03) | 6.86 | (0.00) |
| 1         | Q | 6.06 | (0.00) | 6.33 | (0.00) | 6.60 | (0.00) | 6.67 | (0.00) | 7.24 | (0.02) |
| 2         | N | 4.17 | (0.24) | 4.90 | (0.02) | 5.15 | (0.00) | 5.28 | (0.09) | 5.43 | (0.11) |
| 2         | Q | 5.39 | (0.00) | 5.41 | (0.00) | 5.78 | (0.02) | 5.83 | (0.09) | 6.00 | (0.02) |
| 3         | N | 4.08 | (0.26) | 4.73 | (0.05) | 5.03 | (0.01) | 5.31 | (0.12) | 5.39 | (0.17) |
| 3         | Q | 5.02 | (0.02) | 5.23 | (0.00) | 5.38 | (0.17) | 5.66 | (0.23) | 5.82 | (0.01) |
| 4         | N | 3.95 | (0.27) | 4.73 | (0.04) | 5.00 | (0.01) | 5.24 | (0.16) | 5.38 | (0.18) |
| 4         | Q | 5.01 | (0.03) | 5.14 | (0.22) | 5.17 | (0.00) | 5.60 | (0.24) | 5.83 | (0.02) |
| 5         | N | 3.79 | (0.33) | 4.69 | (0.03) | 4.95 | (0.03) | 5.08 | (0.27) | 5.27 | (0.00) |
| 5         | Q | 4.80 | (0.36) | 5.03 | (0.03) | 5.06 | (0.03) | 5.49 | (0.12) | 5.62 | (0.14) |
| 6         | N | 3.72 | (0.36) | 4.44 | (0.05) | 4.84 | (0.02) | 4.93 | (0.08) | 5.05 | (0.14) |
| 6         | Q | 4.57 | (0.03) | 4.84 | (0.20) | 4.95 | (0.07) | 5.18 | (0.02) | 5.26 | (0.27) |

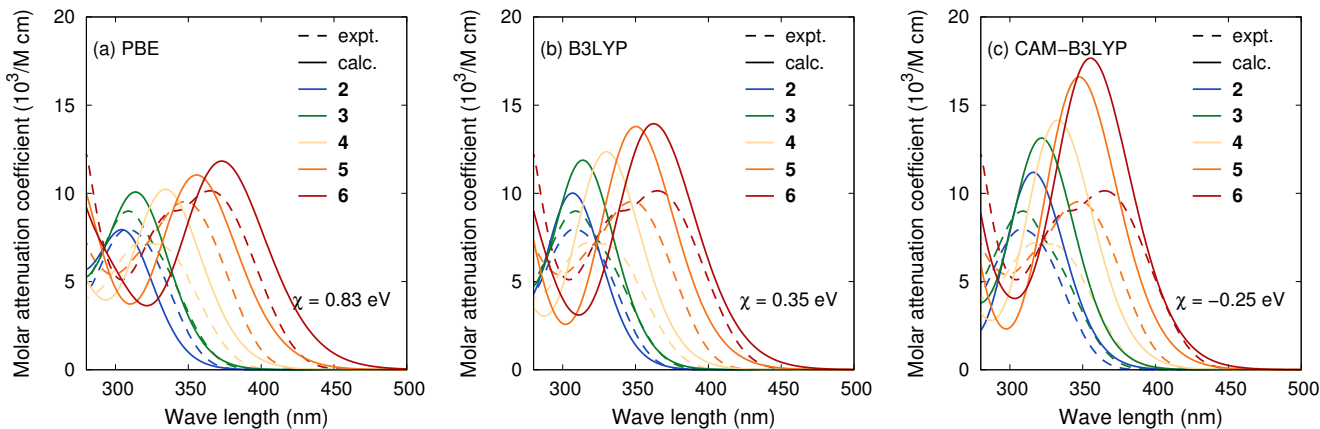

Figure 1: Comparison of the molar attenuation coefficients of **2–6** from experiment<sup>4</sup> and (a) PBE, (b) B3LYP, and (c) CAM-B3LYP calculations. A smearing using a width of 0.25 eV was applied to the latter to mimic the broadening due to vibrations. The calculated spectra are unshifted.

with the exception of CASPT2 and CCSD(T), for which single-point calculations were carried out based on CASSCF and MP2 geometries, respectively. All calculations are performed with NWChem 6.5<sup>5</sup> except for CASSCF and CASPT2, which were performed with MolCas 8.0.<sup>6–8</sup> The MP2 results were extrapolated to the complete basis set (CBS) limit as suggested by Halkier *et al.*<sup>9,10</sup> while the CCSD(T) data were extrapolated to the CBS limit following Jurecka *et al.*<sup>11</sup>. The results of our calculations for  $\Delta E$  are compiled in Table 7.

The experimental reference value for  $\Delta H$  is  $92 \pm 1$  kJ/mol. To obtain  $\Delta E$  we subtract the  $\Delta H - \Delta E$  difference obtained at the DFT level, i.e.

$$\Delta E_{\text{expt}} = \Delta H_{\text{expt}} - (\Delta H_{\text{DFT}} - \Delta E_{\text{DFT}}). \quad (1)$$

Using B3LYP data (see main text), we then obtain  $\Delta E_{\text{expt}} = 94 \pm 1$  kJ/mol.<sup>12</sup> The extrapolated CCSD(T) value of  $\Delta E = 95.5$  kJ/mol, which represents the highest level of calculation among our calculated data, is in fact in very good agreement with the experimental value. Both  $\Delta E_{\text{expt}}$  and  $\Delta E_{\text{CCSD(T)}}$  are shown as reference values in Fig. 4(b) of the main article.

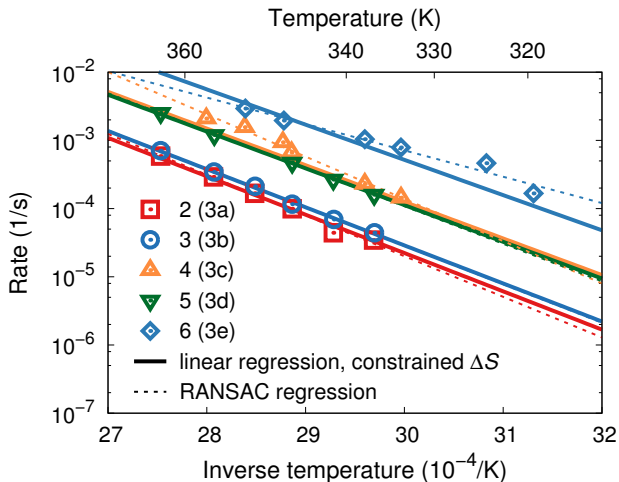

Figure 2: Comparison of different approaches for fitting the experimental data for thermal  $Q \rightarrow$  back-conversion. While the assessment indicates a certain level of uncertainty regarding the thus obtained barriers, it highlights the systematic variation of the conversion rates across the compounds, which are ordered by onset of absorption. For convenience, the numbers in the legend given in brackets refer to the compound enumeration used in Gray *et al.*<sup>4</sup>.

**Table 7: Storage energies (electronic contribution only) for the unsubstituted norbornadiene-quadracyclane system at different levels of calculation.**

| Method         | Basis set                    | $\Delta E$ (kJ/mol) |
|----------------|------------------------------|---------------------|
| M06            | 6-311+G*                     | 54.73               |
| PBE            | 6-311+G*                     | 71.06               |
| B3LYP          | 6-311+G*                     | 99.71               |
| B3LYP          | aug-cc-pvdz                  | 91.62               |
| B3LYP          | aug-cc-pvtz                  | 96.80               |
| MP2            | aug-cc-pvdz                  | 93.76               |
| MP2            | aug-cc-pvtz                  | 86.03               |
| MP2            | aug-cc-pvqz                  | 83.89               |
| MP2            | (extrapolated <sup>a</sup> ) | 82.59               |
| CASPT2//CASSCF | ANO-S DZP                    | 97.91               |
| CASPT2//CASSCF | aug-cc-pvdz                  | 95.22               |
| CCSD(T)//MP2   | aug-cc-pvdz                  | 106.02              |
| CCSD(T)//MP2   | aug-cc-pvtz                  | 98.92               |
| CCSD(T)        | (extrapolated <sup>b</sup> ) | 95.48               |

<sup>a</sup> Extrapolation of MP2 data to basis set limit<sup>9,10</sup>

<sup>b</sup> Extrapolation of CCSD(T) data to MP2 basis set limit.<sup>11</sup>

## Experimental back-conversion barriers

The thermal stability of the substituted compounds considered in the present study has been previously investigated experimentally.<sup>4</sup> To this end, the absorbance increase associated with the N variant was measured as a function of time at different temperatures. The resulting data was fitted to the Eyring equation to extract the enthalpy barriers for back-conversion along with the associated entropies. The thus obtained data exhibits notable error bars and a pronounced correlation between entropy and enthalpy. Furthermore, the half-life times, which compound enthalpies and entropies, exhibit a very noticeable correlation with the onset of absorption; this is very much unlike the barriers for which no clear trend can be observed. These observations alongside the arguments put forth in the “Transition state” section of the paper prompted us to reinspect these data.

In this context, we refitted the experimental data for the time dependence of the absorbance using both the random sample con-

sensus (RANSAC) method as implemented in scikit-learn<sup>13</sup> and constrained linear regression. The RANSAC algorithm is designed to account for data with outliers, albeit typically more suitable for larger data sets. In the case of the constrained linear regression, we fitted the data sets for all five compounds simultaneously using different enthalpies for each compound but only one value for the entropy. Both approaches yield good representations of the data of equal or better quality than the original fit (Fig. 2 and Table II of the main paper). While this illustrates the difficulty of obtaining reliable values for the barriers, more importantly it demonstrates that the conversion enthalpies and the onset of absorption (or alternatively the absorption maximum) are indeed correlated with each other (Fig. 7 of the main paper).

## References

- (1) Knuchel, G.; Grassi, G.; Vogelsanger, B.; Bauder, A. Molecular Structure of Norbornadiene as Determined by Microwave Fourier Transform Spectroscopy. *J. Am. Chem. Soc.* **1993**, *115*, 10845.

- (2) Akimichi, Y.; Kozo, K. Structures of Norbornane and Norbornadiene as Determined by Gas Electron Diffraction. *Bull. Chem. Soc. Jpn.* **1971**, *44*, 2356.
- (3) Mizuno, K.; Fukuyama, T.; Kuchitsu, K. Molecular Structure of Quadricyclane (Tetracyclo[3.2.0.0<sup>2,7</sup>.0<sup>4,6</sup>] Heptane) Studied by Gas Electron Diffraction. *Chem. Lett.* **1972**, *1*, 249.
- (4) Gray, V.; Lennartson, A.; Ratanalert, P.; Börjesson, K.; Moth-Poulsen, K. Diaryl-substituted Norbornadienes With Red-shifted Absorption for Molecular Solar Thermal Energy Storage. *Chem. Commun.* **2014**, *50*, 5330–5332.
- (5) Valiev, M.; Bylaska, E. J.; Govind, N.; Kowalski, K.; Straatsma, T. P.; Van Dam, H. J. J.; Wang, D.; Nieplocha, J.; Apra, E.; Windus, T. L. et al. NWChem: A Comprehensive and Scalable Open-source Solution for Large Scale Molecular Simulations. *Comp. Phys. Comm.* **2010**, *181*, 1477–1489.
- (6) Aquilante, F.; De Vico, L.; Ferré, N.; Ghigo, G.; Malmqvist, P.-Å.; Neogrady, P.; Pedersen, T. B.; Pitoňák, M.; Reiher, M.; Roos, B. O. et al. MOLCAS 7: The Next Generation. *J. Comp. Chem.* **2010**, *31*, 224–247.
- (7) Veryazov, V.; Widmark, P.-O.; Serrano-Andrés, L.; Lindh, R.; Roos, B. O. MOLCAS as a Development Platform for Quantum Chemistry Software. *Int. J. Quantum Chem.* **2004**, *100*, 626–635.
- (8) Karlström, G.; Lindh, R.; Malmqvist, P.-Å.; Roos, B. O.; Ryde, U.; Veryazov, V.; Widmark, P.-O.; Cossi, M.; Schimmelpfennig, B.; Neogrady, P. et al. MOLCAS: A Program Package for Computational Chemistry. *Comp. Mater. Sci.* **2003**, *28*, 222–239.
- (9) Halkier, A.; Helgaker, T.; Jørgensen, P.; Klopper, W.; Koch, H.; Olsen, J.; Wilson, A. K. Basis-set Convergence in Correlated Calculations on Ne, N<sub>2</sub>, and H<sub>2</sub>O. *Chem. Phys. Lett.* **1998**, *286*, 243–252.
- (10) Halkier, A.; Helgaker, T.; Jørgensen, P.; Klopper, W.; Olsen, J. Basis-set Convergence of the Energy in Molecular Hartree-Fock Calculations. *Chem. Phys. Lett.* **1999**, *302*, 437–446.
- (11) Jurecka, P.; Sponer, J.; Cerny, J.; Hobza, P. Benchmark Database of Accurate (MP2 and CCSD(T) Complete Basis Set Limit) Interaction Energies of Small Model Complexes, DNA Base Pairs, and Amino Acid Pairs. *Phys. Chem. Chem. Phys.* **2006**, *8*, 1985–1993.
- (12) An, X.; Xie, Y. Enthalpy of Isomerization of Quadricyclane to Norbornadiene. *Thermochimica Acta* **1993**, *220*, 17.
- (13) scikit-learn. <http://scikit-learn.org/>; accessed 2016/01/18.
